# Supplementary material
Source: publisher site journal article supplement (https://www.spandidos-publications.com/375/downloadSupplementary)

Figure S1. Differential expression of AWPPH in non-small cell lung cancer cell lines, H1581 and H1993, and normal human lung cell line NuLi-1. \*P<0.05.

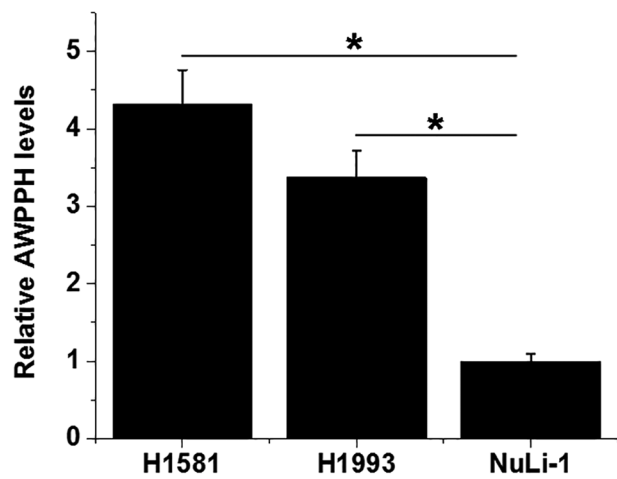

Supplement: Supplementary file 1 [file downloadSupplementary]
